# Supplementary material for: Implementation of an Electronic Monitoring and Evaluation System for the Antiretroviral Treatment Programme in the Cape Winelands District, South Africa: A Qualitative Evaluation
Source: PubMed Central journal article supplement (PMC4429075; doi:10.1371/journal.pone.0127223), 2015-05-12
Supplement: pone.0127223.s005.pdf [file pone.0127223.s005.pdf]

## Interview Guide – Sub-district and district respondents

|                                                    |  |                         |  |
|----------------------------------------------------|--|-------------------------|--|
| Name of Interviewer                                |  | Date                    |  |
| Location (office/facility, sub-district, district) |  | Time interview started  |  |
|                                                    |  | Time interview finished |  |

**Intro script:** Good day, my name is [ \_\_\_\_ ] and I would like to discuss your experience with TIER.net (also known as the e-Register). Everything we talk about today will remain anonymous. We will summarise the perspectives of all of the interviews we conduct to learn more about TIER.net and may share de-identified quotes from people we interview in a report or publication. These reports will not include any names or other personal information. Remember that there are no right or wrong answers and we are sincerely interested in your opinions to improve the use of this system and to inform the upcoming national roll-out.

### Interviewer instructions:

- [provide informed consent and other background info]
- [Please collect the following information prior to the interview and/or during your greetings/introduction]

|                              |  |                                                                                                                  |  |
|------------------------------|--|------------------------------------------------------------------------------------------------------------------|--|
| Name                         |  | Length of time using TIER.net<br>[in months, includes any interaction with system: data entry or report viewing] |  |
| Job title                    |  |                                                                                                                  |  |
| Contact telephone (optional) |  | Contact email (optional)                                                                                         |  |

### Q1. Tell me about your experience with TIER.net (the HIV e-Register).

- [probe]: what do you like about it? What do you dislike about it?

|  |
|--|
|  |
|  |
|  |
|  |
|  |
|  |

**Interviewer Script:** I'll now make a statement. I'd like you to tell me if you Strongly Disagree, Disagree, are Neutral/Unsure, Agree, or Strongly Agree with the statement. Please feel free to explain your answers. I will ask follow-up questions depending on your responses. I will share a few more statements like this during the interview

### Q2. The process of TIER.net implementation was very difficult.

[interviewer, please clearly circle the answer]

|                          |                                          |                |       |                |
|--------------------------|------------------------------------------|----------------|-------|----------------|
| 1                        | 2                                        | 3              | 4     | 5              |
| Strongly Disagree        | Disagree                                 | Neutral/Unsure | Agree | Strongly agree |
| <input type="checkbox"/> | Click here, if respondent does not know. |                |       |                |

[Record explanation of answer below.]

- [If Agree, or Strongly Agree, probe] How was it difficult? What aspects were difficult? Provide examples if possible.
- [If Disagree, or Strongly Disagree] What made it easy? What aspects were difficult? Please provide examples.
- [If neutral] Please tell me why you say that.

|  |
|--|
|  |
|  |
|  |
|  |
|  |

**Q3. Tell me more about the process of implementation.**  
 [probe]:

- Please explain the process.
- How long did it take?
- What worked?
- What did not work?
- Please tell me about the back-capturing process.

|  |
|--|
|  |
|  |
|  |
|  |
|  |
|  |
|  |

|                                                                         |  |
|-------------------------------------------------------------------------|--|
| <b>Q4. How many of the facilities you work with are using TIER.net?</b> |  |
|-------------------------------------------------------------------------|--|

**Q5. Considering the following topics, what had the biggest impact in successful implementation and why?**

- Staff willingness
- Staff ability
- Training and support
- Availability of resources (time, equipment, and space)
- Other factors

|  |
|--|
|  |
|  |
|  |
|  |
|  |

**Q6. TIER.net has improved the quality of our routine ART Monitoring and Evaluation data.** [please clearly circle the answer]

|                   |          |                |       |                |
|-------------------|----------|----------------|-------|----------------|
| 1                 | 2        | 3              | 4     | 5              |
| Strongly Disagree | Disagree | Neutral/Unsure | Agree | Strongly agree |

Check this box, if respondent does not know.

[Record explanation of answer below.]

- [If Agree, or Strongly Agree, probe] How has TIER.net improved data quality? Why do you think that is?
- [If Disagree, or Strongly Disagree] How has TIER.net reduced data quality? Why do you think that is?
- [If neutral] Please tell me why you say that.

|  |
|--|
|  |
|  |
|  |
|  |
|  |

| <b>Q7. TIER.net has had a positive impact on my work.</b>                                                                                                                                                                                                                                                                                             |                                              |                |       |                |
|-------------------------------------------------------------------------------------------------------------------------------------------------------------------------------------------------------------------------------------------------------------------------------------------------------------------------------------------------------|----------------------------------------------|----------------|-------|----------------|
| [interviewer, please clearly circle the answer]                                                                                                                                                                                                                                                                                                       |                                              |                |       |                |
| 1                                                                                                                                                                                                                                                                                                                                                     | 2                                            | 3              | 4     | 5              |
| Strongly Disagree                                                                                                                                                                                                                                                                                                                                     | Disagree                                     | Neutral/Unsure | Agree | Strongly agree |
| <input type="checkbox"/>                                                                                                                                                                                                                                                                                                                              | Check this box, if respondent does not know. |                |       |                |
| [Record explanation of answer below.]                                                                                                                                                                                                                                                                                                                 |                                              |                |       |                |
| <ul style="list-style-type: none"> <li>• [If Agree, or Strongly Agree, probe] How has it had a positive impact on your work? Provide examples if possible.</li> <li>• [If Disagree, or Strongly Disagree] How has it had a negative impact on your work? Please provide examples.</li> <li>• [If neutral] Please tell me why you say that.</li> </ul> |                                              |                |       |                |
|                                                                                                                                                                                                                                                                                                                                                       |                                              |                |       |                |
|                                                                                                                                                                                                                                                                                                                                                       |                                              |                |       |                |
|                                                                                                                                                                                                                                                                                                                                                       |                                              |                |       |                |
|                                                                                                                                                                                                                                                                                                                                                       |                                              |                |       |                |

| <b>Q8. TIER.net has improved the quality of services we deliver to our clients on ART.</b>                                                                                                                                                                        |                                          |                |       |                |
|-------------------------------------------------------------------------------------------------------------------------------------------------------------------------------------------------------------------------------------------------------------------|------------------------------------------|----------------|-------|----------------|
| [interviewer, please clearly circle the answer]                                                                                                                                                                                                                   |                                          |                |       |                |
| 1                                                                                                                                                                                                                                                                 | 2                                        | 3              | 4     | 5              |
| Strongly Disagree                                                                                                                                                                                                                                                 | Disagree                                 | Neutral/Unsure | Agree | Strongly agree |
| <input type="checkbox"/>                                                                                                                                                                                                                                          | Click here, if respondent does not know. |                |       |                |
| [Record explanation of answer below.]                                                                                                                                                                                                                             |                                          |                |       |                |
| <ul style="list-style-type: none"> <li>• [If Agree, or Strongly Agree, probe] How? Provide examples if possible.</li> <li>• [If Disagree, or Strongly Disagree] How? Please provide examples.</li> <li>• [If neutral] Please tell me why you say that.</li> </ul> |                                          |                |       |                |
|                                                                                                                                                                                                                                                                   |                                          |                |       |                |
|                                                                                                                                                                                                                                                                   |                                          |                |       |                |
|                                                                                                                                                                                                                                                                   |                                          |                |       |                |
|                                                                                                                                                                                                                                                                   |                                          |                |       |                |
|                                                                                                                                                                                                                                                                   |                                          |                |       |                |

| <b>Q9. TIER.net has increased your knowledge of data at the facility, sub-district, and district level?</b>                                                                                                                 |                                          |                |       |                |
|-----------------------------------------------------------------------------------------------------------------------------------------------------------------------------------------------------------------------------|------------------------------------------|----------------|-------|----------------|
| [interviewer, please clearly circle the answer]                                                                                                                                                                             |                                          |                |       |                |
| 1                                                                                                                                                                                                                           | 2                                        | 3              | 4     | 5              |
| Strongly Disagree                                                                                                                                                                                                           | Disagree                                 | Neutral/Unsure | Agree | Strongly agree |
| <input type="checkbox"/>                                                                                                                                                                                                    | Click here, if respondent does not know. |                |       |                |
| <ul style="list-style-type: none"> <li>• [probe]: Please tell me why you say that.</li> <li>• [probe]: What impact has TIER.net had on your knowledge of data at the facility, sub-district, and district level?</li> </ul> |                                          |                |       |                |
|                                                                                                                                                                                                                             |                                          |                |       |                |
|                                                                                                                                                                                                                             |                                          |                |       |                |
|                                                                                                                                                                                                                             |                                          |                |       |                |
|                                                                                                                                                                                                                             |                                          |                |       |                |
|                                                                                                                                                                                                                             |                                          |                |       |                |

**Interviewer Script:** I'll now ask a few questions about data use and the future of TIER.net.

**Q10. How do you use the data that is collected through TIER.net?**

[probe]:

- What about reports?
- [If not mentioned, probe on use of the following: monthly, quarterly, missed appointment early & late, and defaulter reports]
- What resources would be needed in order to make better use of the data?

|  |
|--|
|  |
|  |
|  |
|  |
|  |
|  |
|  |

**Q11. What has been the impact of TIER.net on your ability to prioritise support of facilities in the area?**

[probe]:

- What about planning and sub-district/district prioritization
- Has it fit into your plans for next year?

|  |
|--|
|  |
|  |
|  |
|  |

**Q12. What has the impact of TIER.net implementation been on the staff in the facilities you work with?**

[probe]:

- Both during and after implementation of the system.

|  |
|--|
|  |
|  |

**Q13. How might TIER.net help you in the long term/ future?**

|  |
|--|
|  |
|  |
|  |
|  |
|  |
|  |
|  |

**Interviewer Script:** For the following items please indicate if TIER.net has had a positive, negative, or no impact at all on the following items [mark an X in the appropriate column, if unknown indicate in explanation box]. Feel free to include why and how.

| <b>Q14. What has been the impact of TIER.net on...</b> |            |             |            |                    |
|--------------------------------------------------------|------------|-------------|------------|--------------------|
| <b>Item</b>                                            | <b>Pos</b> | <b>None</b> | <b>Neg</b> | <b>Explanation</b> |
| a. Quality of clinical stationery                      |            |             |            |                    |
| b. Data entry workload                                 |            |             |            |                    |
| c. Amount of time entering data                        |            |             |            |                    |
| d. Patient clinic flow                                 |            |             |            |                    |
| e. Patient wait time                                   |            |             |            |                    |
| f. Pharmacy management                                 |            |             |            |                    |
| g. Stock ordering                                      |            |             |            |                    |
| h. Human resources management                          |            |             |            |                    |
| i. Programme planning                                  |            |             |            |                    |
| j. Reporting into Information Systems                  |            |             |            |                    |

**Interviewer Script:** We're just about done; there are just a few final questions.

| <b>Q15. What would you change about the TIER.net system?</b> |
|--------------------------------------------------------------|
|                                                              |
|                                                              |
|                                                              |
|                                                              |

| <b>Q16. Do you have any other issues you would like to share on TIER.net?</b> |
|-------------------------------------------------------------------------------|
|                                                                               |
|                                                                               |
|                                                                               |
|                                                                               |

**Interviewer Script:** Thank you very much for your time and opinions. The results of this study should be available soon. Prior to finalisation, a draft report will be made available for review and feedback.
